# Supplementary material for: A series of coordination polymers constructed from in situ amidation ligands: syntheses, structures and luminescent properties
Source: Royal Society of Chemistry journal article supplement (doi:10.1039/c2ce06730g), 2012-01-01
Supplement: c2ce06730g.pdf [file c2ce06730g.pdf]

## A series of coordination polymers constructed from *in situ* amidation ligands: syntheses, structures and luminescent properties

Xiao-Yang Yu,<sup>a,b</sup> Xiao-Bing Cui,<sup>c</sup> Jia-Jun Yang,<sup>a,b</sup> Jian-Po Zhang,<sup>b</sup> Yu-Hui Luo,<sup>a</sup> Hong Zhang,<sup>\*a</sup> Wei-Ping Gao<sup>\*b</sup>

<sup>a</sup> Key Laboratory of Polyoxometalate Science of Education, Department of Chemistry, Northeast Normal University, Changchun, Jilin, 130024, P. R. China. Fax: +86-431-85099372; Tel: +86-431-82684009; E-mail: zhangh@nenu.edu.cn (H. Zhang)

<sup>b</sup> Jilin Institute of Chemical Technology, Jilin City, Jilin, 132022, P. R. China. E-mail: yangyangyu\_0@yahoo.com.cn (X.-Y. Yu)

<sup>c</sup> College of Chemistry and State Key Laboratory of Inorganic Synthesis and Preparative Chemistry, Jilin University, Changchun, Jilin, 130021, P. R. China

**Table S1** Selected bond lengths (Å) and angles (°) for compounds **1-4**;

**Table S2** Hydrogen-bond parameters for compounds **1-4**;

**Table S3** Selected  $\pi$ - $\pi$  interactions geometry for **1-4** (The plane-to-plane distance ( $d$ ), the dihedral angles ( $\alpha$ ), the centroid-centroid distance ( $c$ ) and the displacement angle between the planes ( $\theta$ ));

**Table S4** The C-O and C-N distances of the acylhydrazidate ring in compounds **1-4**;

**Scheme S1** The five kinds of coordination modes of H<sub>3</sub>bch found by Xu;<sup>7a,7e</sup>

**Fig. S1** The fluorescent emissions of H<sub>4</sub>bbh ( $\lambda_{\text{ex}} = 394$  nm) in solid state at room temperature.

**Table S1** Selected bond lengths (Å) and angles (°) for compounds **1-4**.

| <b>Compound 1</b> |            |                     |            |
|-------------------|------------|---------------------|------------|
| Cu(1)-O(2)A       | 1.862(3)   | C(1)-O(1)           | 1.249(5)   |
| Cu(1)-N(2)        | 1.889(3)   | C(8)-O(2)           | 1.282(4)   |
| Cu(1)-O(1W)       | 2.516(3)   | C(9)-O(3)           | 1.217(5)   |
| Cu(1)-Cu(1)A      | 2.6291(13) | C(9)-O(4)           | 1.316(5)   |
| C(1)-N(1)         | 1.330(5)   | C(10)-O(6)          | 1.193(5)   |
| C(8)-N(2)         | 1.322(4)   | C(10)-O(5)          | 1.315(5)   |
| N(1)-N(2)         | 1.406(4)   |                     |            |
| O(2)A-Cu(1)-N(2)  | 168.75(12) | O(2)-C(8)-N(2)      | 120.8(3)   |
| O(2)A-Cu(1)-O(1W) | 103.15(12) | O(3)-C(9)-O(4)      | 123.4(4)   |
| N(2)-Cu(1)-O(1W)  | 87.94(12)  | O(6)-C(10)-O(5)     | 124.9(3)   |
| O(1)-C(1)-N(1)    | 121.4(3)   |                     |            |
| <b>Compound 2</b> |            |                     |            |
| Fe(1)-O(4)D       | 2.017(6)   | C(1)-O(1)           | 1.271(11)  |
| Fe(1)-O(1)        | 2.120(6)   | C(1)-N(1)           | 1.303(11)  |
| Fe(1)-O(6)C       | 2.125(6)   | C(8)-O(2)           | 1.260(11)  |
| Fe(1)-O(5)E       | 2.150(6)   | C(8)-N(2)           | 1.342(12)  |
| Fe(1)-O(3W)       | 2.221(6)   | C(9)-O(3)           | 1.257(11)  |
| Fe(1)-N(1)        | 2.277(7)   | C(9)-O(4)           | 1.266(11)  |
| Fe(2)-O(3)D       | 2.018(6)   | C(10)-O(6)          | 1.218(9)   |
| Fe(2)-O(2W)       | 2.132(6)   | C(10)-O(5)          | 1.219(10)  |
| Fe(2)-O(3W)       | 2.289(6)   | N(1)-N(2)           | 1.413(11)  |
| O(1)-Fe(1)-O(6)C  | 93.9(2)    | O(5)E-Fe(1)-O(3W)   | 83.1(2)    |
| O(1)-Fe(1)-O(5)E  | 92.3(2)    | O(5)E-Fe(1)-N(1)    | 96.7(2)    |
| O(1)-Fe(1)-O(3W)  | 96.9(2)    | O(6)C-Fe(1)-O(5)E   | 166.7(2)   |
| O(1)-Fe(1)-N(1)   | 59.7(2)    | O(6)C-Fe(1)-N(1)    | 96.6(2)    |
| O(3)B-Fe(2)-O(3)D | 180.000(1) | O(6)C-Fe(1)-O(3W)   | 84.4(2)    |
| O(3)B-Fe(2)-O(2W) | 90.6(3)    | O(2W)A-Fe(2)-O(2W)  | 180.000(1) |
| O(3)D-Fe(2)-O(2W) | 89.4(3)    | O(2W)A-Fe(2)-O(3W)A | 85.9(2)    |
| O(3)B-Fe(2)-O(3W) | 86.8(2)    | O(2W)-Fe(2)-O(3W)A  | 94.1(2)    |
| O(3)D-Fe(2)-O(3W) | 93.2(2)    | O(2W)-Fe(2)-O(3W)   | 85.9(2)    |
| O(4)D-Fe(1)-O(1)  | 158.7(3)   | O(3W)A-Fe(2)-O(3W)  | 180.000(2) |
| O(4)D-Fe(1)-O(6)C | 91.1(3)    | O(3W)-Fe(1)-N(1)    | 156.6(3)   |
| O(4)D-Fe(1)-O(3W) | 104.2(2)   | O(3)-C(9)-O(4)      | 125.8(8)   |
| O(4)D-Fe(1)-O(5)E | 87.3(3)    | O(6)-C(10)-O(5)     | 129.0(7)   |
| O(4)D-Fe(1)-N(1)  | 99.2(3)    |                     |            |
| <b>Compound 3</b> |            |                     |            |
| Zn(1)-O(3)B       | 1.948(2)   | C(1)-O(1)           | 1.309(4)   |
| Zn(1)-O(1)        | 1.980(2)   | C(4)-O(2)           | 1.249(4)   |
| Zn(1)-N(5)        | 2.042(3)   | C(5)-O(3)           | 1.292(4)   |
| Zn(1)-O(1W)       | 2.103(3)   | C(8)-O(4)           | 1.252(4)   |
| C(1)-N(1)         | 1.303(4)   | N(1)-N(2)           | 1.379(4)   |
| C(4)-N(2)         | 1.328(4)   | N(3)-N(4)           | 1.387(4)   |

|                   |            |                    |           |
|-------------------|------------|--------------------|-----------|
| C(5)-N(3)         | 1.318(4)   | N(5)-N(5)A         | 1.446(5)  |
| C(8)-N(4)         | 1.333(4)   |                    |           |
| O(3)B-Zn(1)-O(1)  | 106.41(10) | N(5)-Zn(1)-O(1W)   | 98.65(11) |
| O(3)B-Zn(1)-N(5)  | 115.25(11) | N(1)-C(1)-O(1)     | 117.3(3)  |
| O(1)-Zn(1)-N(5)   | 131.76(10) | O(2)-C(4)-N(2)     | 121.8(3)  |
| O(3)B-Zn(1)-O(1W) | 98.36(10)  | O(3)-C(5)-N(3)     | 119.9(3)  |
| O(1)-Zn(1)-O(1W)  | 98.26(10)  | O(4)-C(8)-N(4)     | 121.4(3)  |
| <b>Compound 4</b> |            |                    |           |
| Cd(1)-O(18)       | 2.292(7)   | C(27)-N(5)         | 1.302(14) |
| Cd(1)-O(17)       | 2.350(9)   | C(28)-N(8)         | 1.383(17) |
| Cd(1)-N(9)        | 2.378(8)   | C(36)-N(7)         | 1.334(15) |
| Cd(1)-O(1)        | 2.400(8)   | C(1)-O(1)          | 1.279(15) |
| Cd(1)-N(10)       | 2.418(8)   | C(5)-O(4)          | 1.223(14) |
| Cd(1)-O(8)        | 2.456(8)   | C(5)-O(3)          | 1.266(14) |
| Cd(1)-O(7)        | 2.534(8)   | C(9)-O(2)          | 1.309(13) |
| Cd(2)-O(19)       | 2.354(8)   | C(10)-O(5)         | 1.289(15) |
| Cd(2)-O(20)       | 2.383(9)   | C(14)-O(7)         | 1.268(14) |
| Cd(2)-N(12)       | 2.391(9)   | C(14)-O(8)         | 1.285(13) |
| Cd(2)-O(10)A      | 2.399(8)   | C(18)-O(6)         | 1.346(12) |
| Cd(2)-N(11)       | 2.418(8)   | C(19)-O(10)        | 1.303(14) |
| Cd(2)-O(12)       | 2.452(8)   | C(23)-O(12)        | 1.253(13) |
| Cd(2)-O(11)       | 2.514(9)   | C(23)-O(11)        | 1.293(13) |
| C(1)-N(1)         | 1.363(15)  | C(27)-O(9)         | 1.336(12) |
| C(9)-N(2)         | 1.304(14)  | C(28)-O(14)        | 1.247(16) |
| C(10)-N(3)        | 1.351(16)  | C(32)-O(16)        | 1.248(15) |
| C(18)-N(4)        | 1.317(14)  | C(32)-O(15)        | 1.271(14) |
| C(19)-N(6)        | 1.349(15)  | C(36)-O(13)        | 1.281(14) |
| O(18)-Cd(1)-O(17) | 172.4(3)   | N(12)-Cd(2)-N(11)  | 69.9(3)   |
| O(18)-Cd(1)-N(9)  | 96.0(3)    | O(10)A-Cd(2)-N(11) | 74.9(3)   |
| O(17)-Cd(1)-N(9)  | 87.8(4)    | O(19)-Cd(2)-O(12)  | 90.5(3)   |
| O(18)-Cd(1)-O(1)  | 100.4(3)   | N(12)-Cd(2)-O(10)A | 135.4(3)  |
| O(17)-Cd(1)-O(1)  | 80.9(3)    | O(19)-Cd(2)-N(11)  | 79.7(3)   |
| N(9)-Cd(1)-O(1)   | 138.7(3)   | O(20)-Cd(2)-O(12)  | 84.7(3)   |
| O(18)-Cd(1)-N(10) | 81.5(3)    | N(12)-Cd(2)-O(12)  | 85.8(3)   |
| O(17)-Cd(1)-N(10) | 106.1(3)   | O(10)A-Cd(2)-O(12) | 132.8(3)  |
| N(9)-Cd(1)-N(10)  | 69.0(3)    | N(11)-Cd(2)-O(12)  | 152.3(3)  |
| O(1)-Cd(1)-N(10)  | 76.3(3)    | O(19)-Cd(2)-O(11)  | 83.4(3)   |
| O(18)-Cd(1)-O(8)  | 81.1(3)    | O(20)-Cd(2)-O(11)  | 92.1(3)   |
| O(17)-Cd(1)-O(8)  | 91.7(3)    | N(12)-Cd(2)-O(11)  | 139.1(3)  |
| N(9)-Cd(1)-O(8)   | 138.5(3)   | O(10)A-Cd(2)-O(11) | 83.2(3)   |
| O(1)-Cd(1)-O(8)   | 81.7(3)    | N(11)-Cd(2)-O(11)  | 148.3(3)  |
| N(10)-Cd(1)-O(8)  | 148.8(3)   | O(12)-Cd(2)-O(11)  | 53.3(2)   |
| O(18)-Cd(1)-O(7)  | 89.9(3)    | O(1)-C(1)-N(1)     | 123.2(11) |
| O(17)-Cd(1)-O(7)  | 83.8(3)    | O(4)-C(5)-O(3)     | 123.4(11) |

---

|                    |          |                   |           |
|--------------------|----------|-------------------|-----------|
| N(9)-Cd(1)-O(7)    | 85.3(3)  | N(2)-C(9)-O(2)    | 121.8(10) |
| O(1)-Cd(1)-O(7)    | 131.9(3) | O(5)-C(10)-N(3)   | 121.7(11) |
| N(10)-Cd(1)-O(7)   | 151.7(3) | O(7)-C(14)-O(8)   | 123.3(10) |
| O(8)-Cd(1)-O(7)    | 53.5(2)  | N(4)-C(18)-O(6)   | 119.2(9)  |
| O(19)-Cd(2)-O(20)  | 174.8(3) | O(10)-C(19)-N(6)  | 118.1(11) |
| O(19)-Cd(2)-N(12)  | 96.6(3)  | O(12)-C(23)-O(11) | 122.2(9)  |
| O(20)-Cd(2)-N(12)  | 85.1(4)  | N(5)-C(27)-O(9)   | 119.0(9)  |
| O(19)-Cd(2)-O(10)A | 103.2(3) | O(14)-C(28)-N(8)  | 120.5(12) |
| O(20)-Cd(2)-O(10)A | 78.7(3)  | O(16)-C(32)-O(15) | 126.7(10) |
| O(20)-Cd(2)-N(11)  | 105.5(3) |                   |           |

---

Symmetry code for **1**: A, 3-x, -y, 1-z

Symmetry codes for **2**: A, 1-x, 1-y, 1-z; B, 1-x, 1-y, 2-z; C, -x, -y, 2-z; D, x, y, -1+z; E, 1-x, -y, 2-z;

Symmetry codes for **3**: A, 1-x, 2-y, 1-z; B, 2-x, 1/2+y, 3/2-z;

Symmetry code for **4**: A, 1/2+x, -y, z;

**Table S2** Selected hydrogen-bond parameters for compounds **1-4**.

| D-H...A           | <i>d</i> (D-H)( Å) | <i>d</i> (H...A)( Å) | <i>d</i> (D...A)( Å) | ∠(D-H...A)( °) |
|-------------------|--------------------|----------------------|----------------------|----------------|
| <b>Compound 1</b> |                    |                      |                      |                |
| N1-H1...O1W       | 0.94(6)            | 2.08(6)              | 2.807(4)             | 134(5)         |
| O4-H4...O2WD      | 0.82               | 1.84                 | 2.651(5)             | 172.2          |
| O5-H5...O1B       | 0.82               | 1.79                 | 2.604(4)             | 173.6          |
| O1W-H1WA...O2WE   | 0.85               | 2.47                 | 3.190(5)             | 143.3          |
| O1W-H1WA...O3E    | 0.85               | 2.50                 | 3.094(5)             | 127.6          |
| O1W-H1WB...O6F    | 0.85               | 2.10                 | 2.820(4)             | 142.1          |
| O2W-H2A...O5G     | 0.89(6)            | 2.46(6)              | 3.111(5)             | 130(4)         |
| O2W-H2B...O1B     | 0.86(8)            | 1.93(8)              | 2.764(5)             | 162(8)         |
| <b>Compound 2</b> |                    |                      |                      |                |
| O3W-H3WB...O1WA   | 0.85               | 1.84                 | 2.678(10)            | 166.1          |
| O1W-H1WA...O1D    | 0.85               | 1.98                 | 2.813(9)             | 167.1          |
| O1W-H1WB...O2G    | 0.85               | 2.17                 | 2.942(10)            | 151.0          |
| <b>Compound 3</b> |                    |                      |                      |                |
| O3W-H3WA...O1WG   | 0.85               | 2.27                 | 3.048(4)             | 152.9          |
| O3W-H3WB...O2H    | 0.85               | 1.89                 | 2.719(3)             | 162.0          |
| O2W-H2WB...O3W    | 0.85               | 2.11                 | 2.954(4)             | 170.9          |
| O2W-H2WA...O4I    | 0.85               | 1.87                 | 2.717(3)             | 175.4          |
| O1W-H1WB...O1F    | 0.85               | 1.93                 | 2.718(3)             | 154.1          |
| O1W-H1WA...O2WA   | 0.85               | 1.86                 | 2.711(4)             | 176.3          |
| N2-H2...O4E       | 0.86               | 1.95                 | 2.804(4)             | 175.5          |
| N4-H4...O2D       | 0.86               | 1.98                 | 2.838(4)             | 176.3          |
| <b>Compound 4</b> |                    |                      |                      |                |
| O13-H13...N4      | 0.82               | 1.93                 | 2.730(12)            | 166.1          |
| N1-H1A...O8       | 0.86               | 1.89                 | 2.726(13)            | 162.3          |
| O6-H6...N7        | 0.82               | 1.99                 | 2.803(12)            | 169.9          |
| O19-H19B...O16    | 0.85               | 1.89                 | 2.744(12)            | 176.7          |
| O2-H2...N5C       | 0.82               | 1.91                 | 2.729(12)            | 174.0          |
| O18-H18B...O5C    | 0.85               | 2.01                 | 2.856(11)            | 176.6          |
| N8-H8A...O15C     | 0.86               | 1.93                 | 2.786(14)            | 177.8          |
| O18-H18A...O3E    | 0.85               | 1.93                 | 2.775(12)            | 177.1          |
| O9-H9...N2E       | 0.82               | 1.98                 | 2.795(11)            | 174.7          |
| O19-H19A...O14E   | 0.85               | 2.01                 | 2.856(12)            | 177.0          |
| O17-H17A...O3H    | 0.85               | 2.34                 | 3.181(14)            | 170.2          |
| O17-H17B...O5G    | 0.85               | 2.07                 | 2.910(12)            | 169.6          |
| N3-H3A...O4D      | 0.86               | 1.94                 | 2.799(14)            | 177.8          |
| N6-H6A...O11F     | 0.86               | 1.92                 | 2.754(13)            | 164.6          |
| O20-H20B...O15I   | 0.85               | 2.21                 | 2.951(14)            | 145.8          |

Symmetry codes for compound **1**: B, *x*, *1+y*, *z*; D, *-x*, *1-y*, *-z*; E, *1+x*, *-1+y*, *z*; F, *2-x*, *-y*, *1-z*; G, *1-x*, *1-y*, *-z*;

Symmetry codes for compound **2**: A, 1-x, 1-y, 1-z; D, x, y, -1+z; G, -x, -y, -1+z;

Symmetry codes for compound **3**: A, 1-x, 2-y, 1-z; B, 2-x, 1/2+y, 3/2-z; D, 1+x, y, 1+z; E, -1+x, y, -1+z; F, 2-x, 2-y, 1-z; G, -1+x, y, z; H, x, y, 1+z; I, x, 3/2-y, 1/2+z;

Symmetry codes for compound **4**: C, -1/2+x, 1-y, z; D, 1+x, y, z; E, 1/2+x, 1-y, z; F, -1/2+x, -y, z; G, -1/2+x, 2-y, z; H, 1/2+x, 2-y, z; I, x, -1+y, z.

**Table S3** Selected  $\pi$ - $\pi$  interactions geometry for **1-4** (The plane-to-plane distance ( $d$ ), the dihedral angles ( $\alpha$ ), the centroid-centroid distance ( $c$ ) and the displacement angle between the planes ( $\theta$ )).

| $\pi$ - $\pi$ interactions                                                                                            | $d$ (Å)    | $\alpha$ (°) | $c$ (Å)  | $\theta$ (°) |
|-----------------------------------------------------------------------------------------------------------------------|------------|--------------|----------|--------------|
| <b>Compound 1</b>                                                                                                     |            |              |          |              |
| H <sub>3</sub> bbch-H <sub>3</sub> bbch (inter-molecular)<br>Cg(1) [ 1] → Cg(1) [2756.01]                             | 3.3490(15) | 0            | 3.596(2) | 21.38        |
| <b>Compound 2</b>                                                                                                     |            |              |          |              |
| Hbbch-Hbbch (inter-molecular)<br>Cg6 [ 1] → Cg5 [2557.01]                                                             | 3.216(3)   | 1.0(4)       | 3.386(5) | 18.25        |
| Hbbch-Hbbch (inter-molecular)<br>Cg(6) [ 1] → Cg(5) [2657.01]                                                         | 3.215(3)   | 1.0(4)       | 3.526(5) | 24.22        |
| <b>Compound 3</b>                                                                                                     |            |              |          |              |
| H <sub>2</sub> bbh-H <sub>2</sub> bbh (inter-layers)<br>Cg(4) [ 1] → Cg(4) [4564.01]                                  | 3.2279(15) | 4            | 3.512(2) | 23.23        |
| H <sub>2</sub> bbh-H <sub>2</sub> bbh (inter-layers)<br>Cg(4) [ 1] → Cg(4) [4565.01]                                  | 3.2377(15) | 4            | 3.513(2) | 22.82        |
| <b>Compound 4</b>                                                                                                     |            |              |          |              |
| H <sub>2</sub> bch-H <sub>2</sub> bch<br>(inter-molecular in part A)<br>Cg(10) [ 2] → Cg(11) [4465.02]                | 3.467(5)   | 1.8(5)       | 3.978(7) | 29.38        |
| H <sub>2</sub> bch-H <sub>2</sub> bch<br>(inter-molecular in part A)<br>Cg(10) [ 2] → Cg(11) [ 4475.02]               | 3.531(5)   | 1.8(5)       | 3.888(7) | 24.71        |
| 2,2'-bpy-2,2'-bpy<br>(inter-molecular between part A and part C)<br>Cg(3) [ 1] → Cg(9) [2664.02]                      | 3.522(5)   | 2.8(6)       | 3.590(8) | 11.17        |
| H <sub>2</sub> bch-H <sub>2</sub> bch<br>(inter-molecular between part B and part C)<br>Cg(4) [ 1] → Cg(15) [1555.03] | 3.518(5)   | 0.2(5)       | 3.889(7) | 25.25        |
| H <sub>2</sub> bch-H <sub>2</sub> bch<br>(inter-molecular between part B and part C)<br>Cg(4) [ 1] → Cg(15) [1545.03] | 3.580(5)   | 0.2(5)       | 3.966(7) | 25.48        |
| Cg(1) in compound <b>1</b> : the 6-membered ring containing N1N2C8C7C2C1.                                             |            |              |          |              |
| Cg(5) in compound <b>2</b> : the 6-membered ring containing N1N2C8C7C2C1.                                             |            |              |          |              |
| Cg(6) in compound <b>2</b> : the 6-membered ring containing C2C3C4C5C6C7.                                             |            |              |          |              |
| Cg(4) in compound <b>3</b> : the 6-membered ring containing C2C3C9C6C7C10.                                            |            |              |          |              |
| Cg(3) in compound <b>4</b> : the 6-membered ring containing N12C52C53C54C55C56.                                       |            |              |          |              |
| Cg(4) in compound <b>4</b> : the 6-membered ring containing C20C21C22C24C25C26.                                       |            |              |          |              |
| Cg(9) in compound <b>4</b> : the 6-membered ring containing N10C42C43C44C45C46.                                       |            |              |          |              |
| Cg(10) in compound <b>4</b> : the 6-membered ring containing C2C3C4C6C7C8.                                            |            |              |          |              |
| Cg(11) in compound <b>3</b> : the 6-membered ring containing C11C12C13C15C16C17.                                      |            |              |          |              |
| Cg(15) in compound <b>3</b> : the 6-membered ring containing C29C30C31C33C34C35.                                      |            |              |          |              |

**Table S4** The C-O and C-N distances of the acylhydrazidate ring in compounds **1-4**.

| compound | $d(\text{C-O})$ (Å) | $d(\text{C=O})$ (Å) | $d(\text{C=N})$ (Å) | $d(\text{C-N})$ (Å) |
|----------|---------------------|---------------------|---------------------|---------------------|
| <b>1</b> | C8-O2=1.282(4)      | C1-O1=1.249(5)      | C8-N2=1.322(4)      | C1-N1=1.330(5)      |
| <b>2</b> | C1-O1=1.271(11)     | C8-O2=1.260(11)     | C1-N1=1.303(11)     | C8-N2=1.342(12)     |
| <b>3</b> | C1-O1=1.309(4)      | C4-O2=1.249(4)      | C1-N1=1.303(4)      | C4-N2=1.328(4)      |
|          | C5-O3=1.292(4)      | C8-O4=1.252(4)      | C5-N3=1.318(4)      | C8-N4=1.333(4)      |
| <b>4</b> | C9-O2=1.309(13)     | C1-O1=1.279(15)     | C9-N2=1.304(14)     | C1-N1=1.363(15)     |
|          | C18-O6=1.346(12)    | C10-O5=1.289(15)    | C18-N4=1.317(14)    | C10-N3=1.351(16)    |
|          | C27-O9=1.336(12)    | C19-O10=1.303(14)   | C27-N5=1.302(14)    | C19-N6=1.349(15)    |
|          | C36-O13=1.281(14)   | C28-O14=1.247(16)   | C36-N7=1.334(15)    | C28-N8=1.383(17)    |



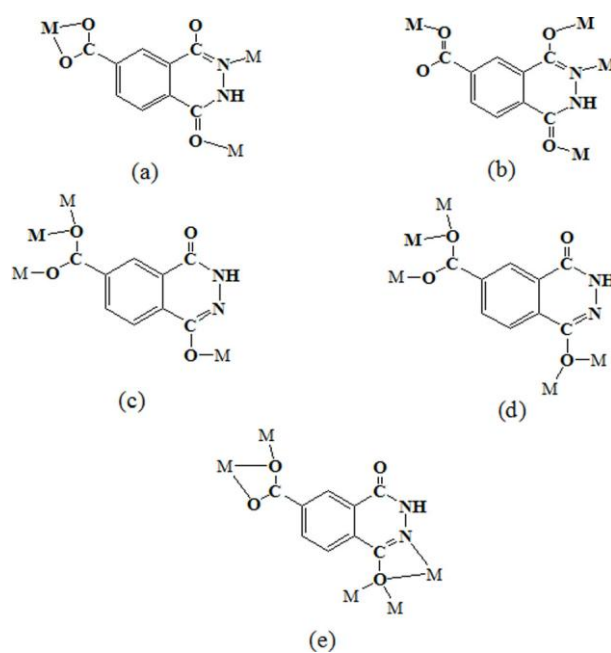

**Scheme S1** The five kinds of coordination modes of H<sub>3</sub>bch found by Xu.<sup>7a,7e</sup>

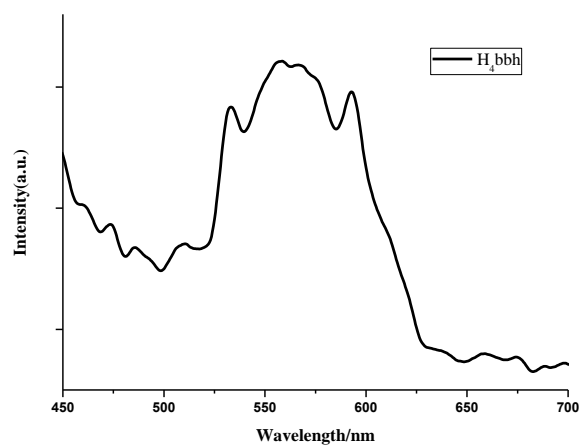

**Fig. S1** The fluorescent emissions of H<sub>4</sub>bbh ( $\lambda_{\text{ex}} = 394 \text{ nm}$ ) in solid state at room temperature.
